# Supplementary material for: An assessment of the evidence for antibacterial activity of stinging nettle (Urtica dioica) extracts
Source: PubMed Central journal article supplement (PMC9175978; doi:10.1099/acmi.0.000336), 2022-03-24
Supplement: acmi-4-0336-s001.pdf [file acmi-4-0336-s001.pdf]

*Supplementary Figures for*

**An assessment of the evidence for antibacterial activity of stinging nettle (*Urtica dioica*) extracts**

Freya Harrison<sup>1</sup>, Jessica Furner-Pardoe<sup>1,2</sup>, Erin Connelly<sup>1</sup>

<sup>1</sup>School of Life Sciences, Gibbet Hill Campus, University of Warwick, Coventry CV4 7AL, UK

<sup>2</sup>Warwick Medical School, Gibbet Hill Campus, University of Warwick, Coventry CV4 7AL, UK

Corresponding authors: FH [f.harrison@warwick.ac.uk](mailto:f.harrison@warwick.ac.uk) & EC [erin.connelly@warwick.ac.uk](mailto:erin.connelly@warwick.ac.uk)

*This file contains Figures S1 and S2*

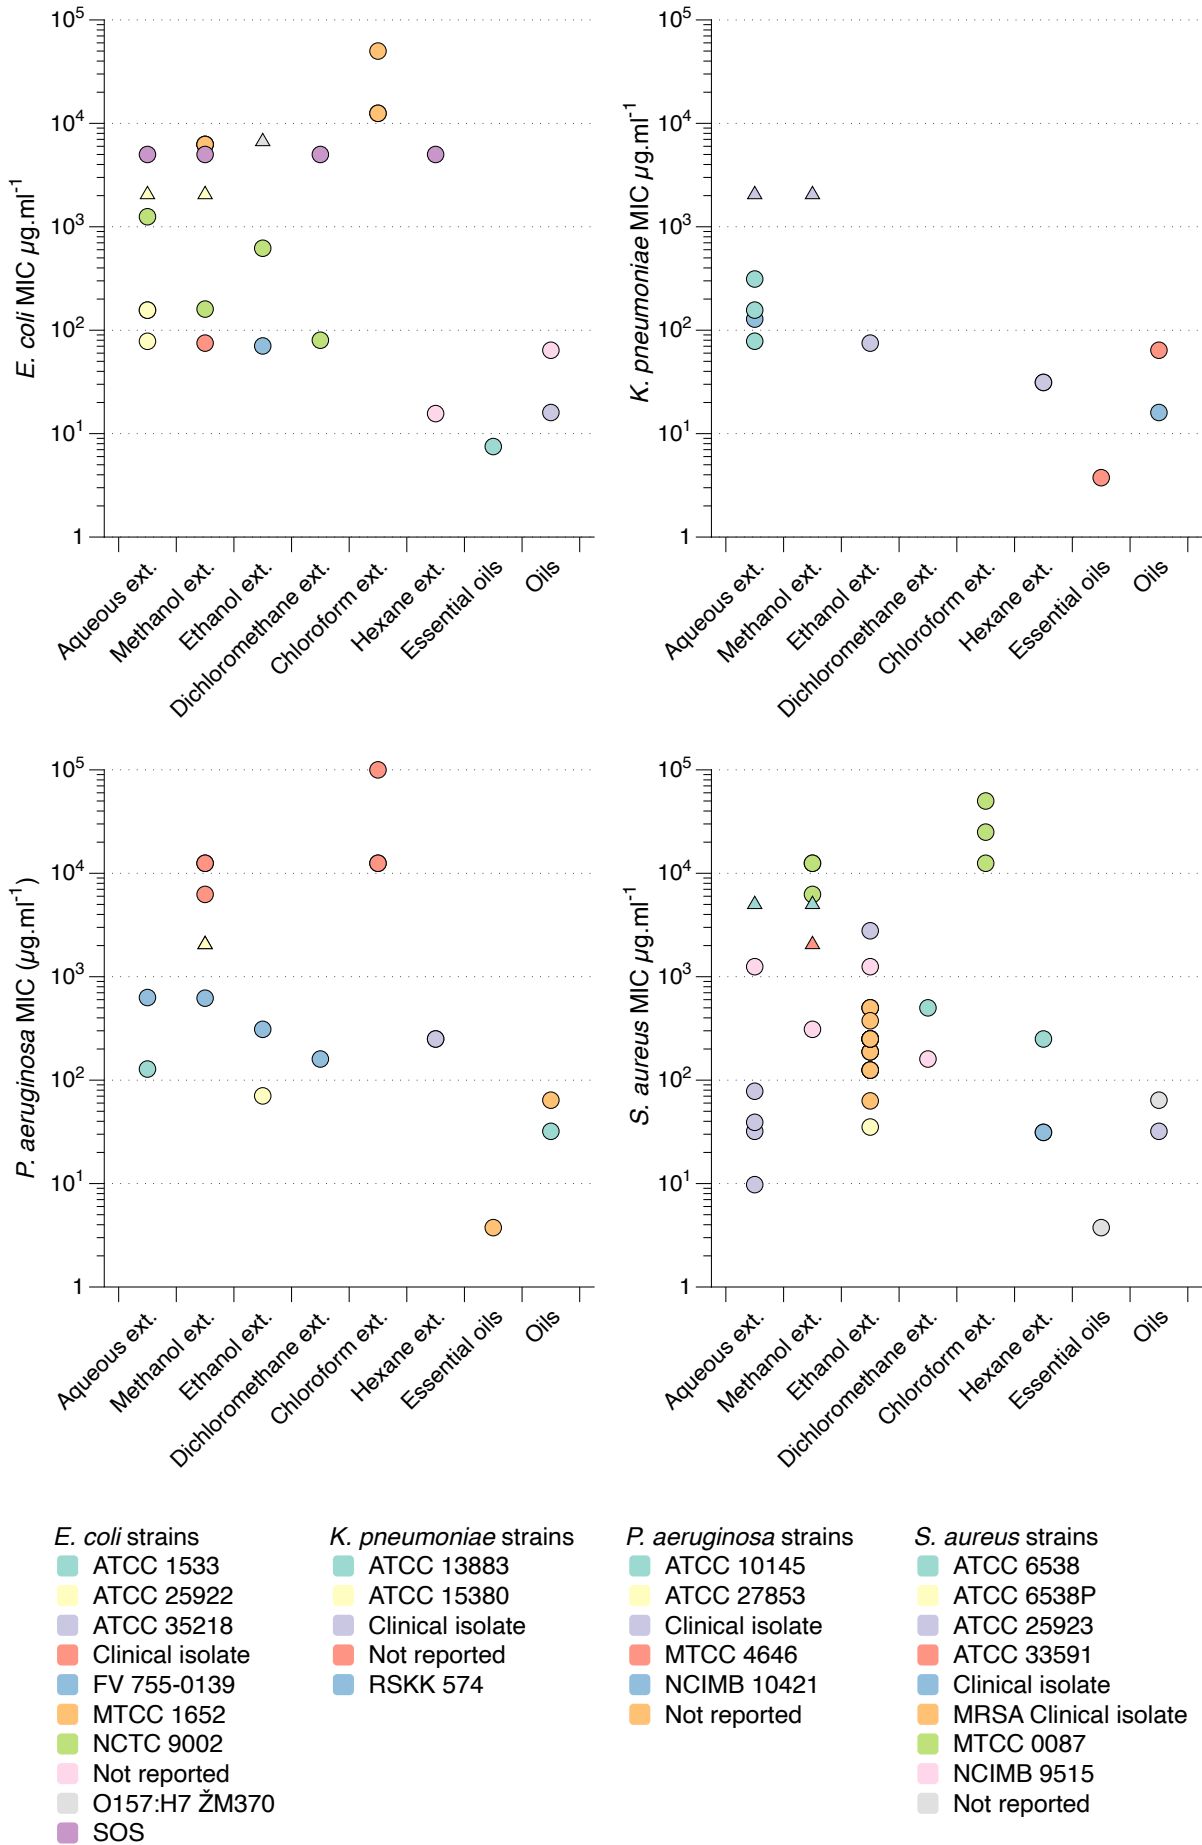

**Figure S1.** Data from Figure 1, colour coded by bacterial strain or isolate tested.

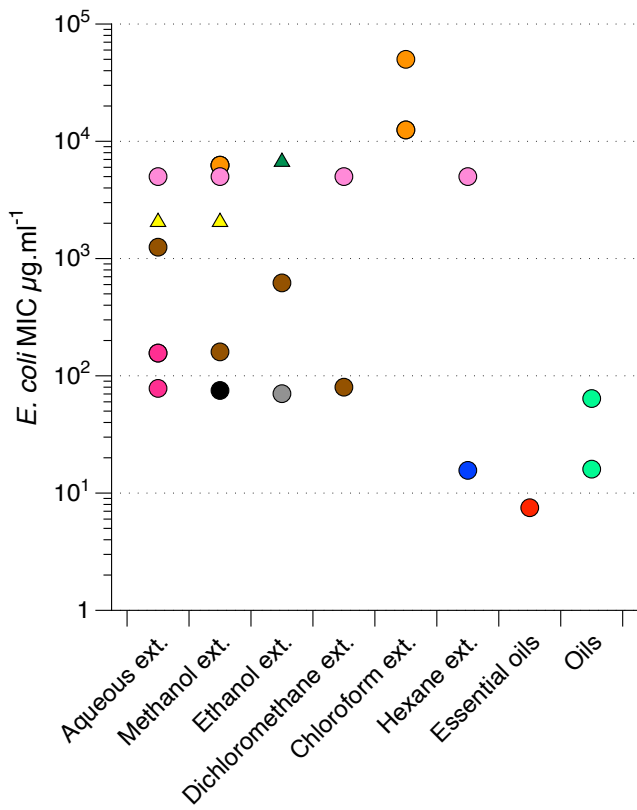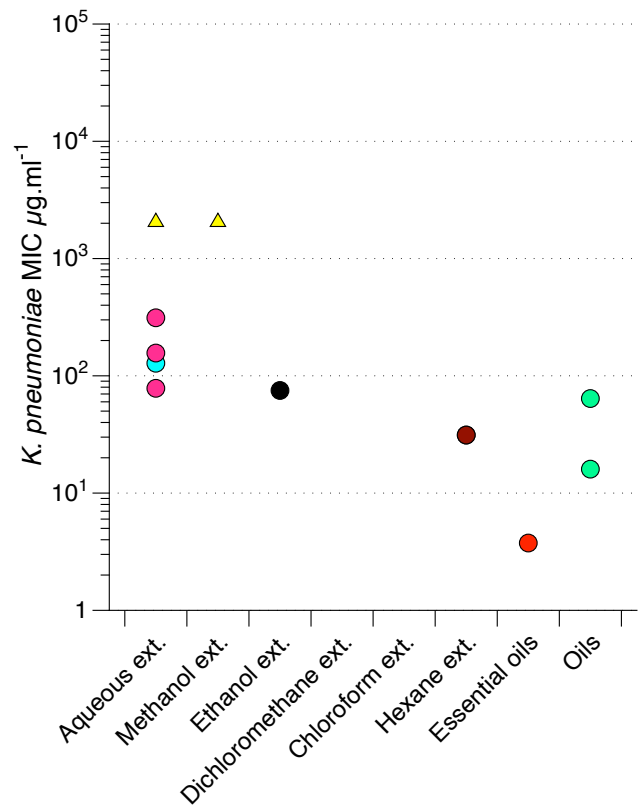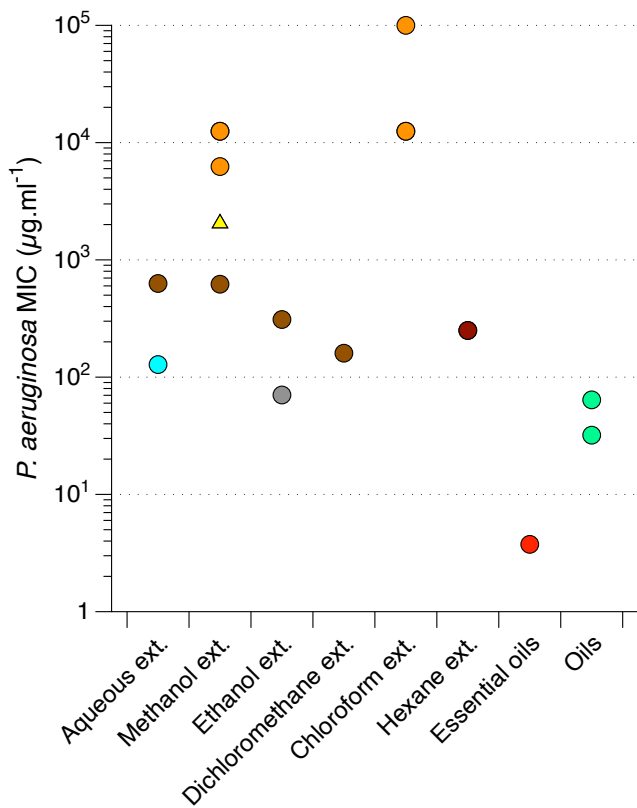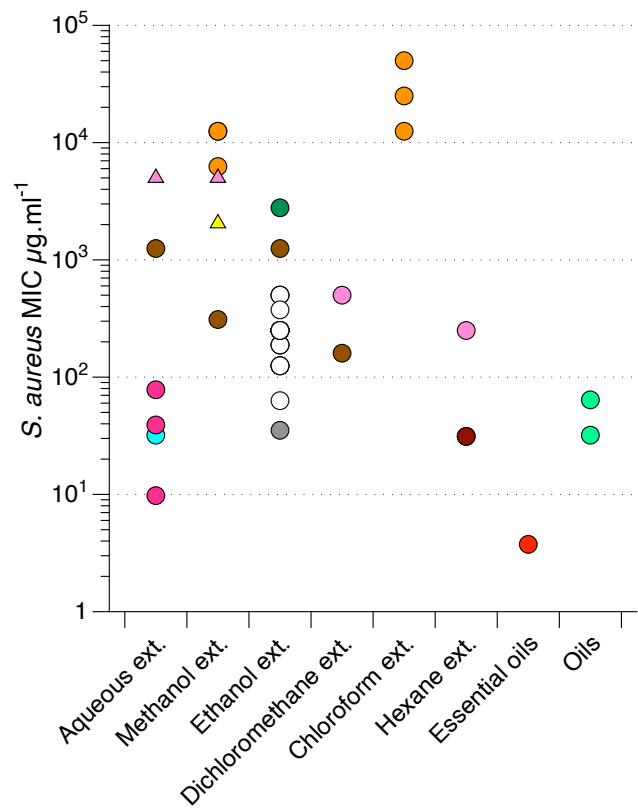

- Batool 2017
- Bobis 2015
- Dar 2012/2013
- Deliorman Orhan 2012
- Generalic Mekinic 2019
- Kan 2009
- Korpe 2013
- Rajput 2019
- Ramtin 2013
- Singh 2012
- Süzgeç-Selçuk 2011
- Velasco Lazama 2020
- Zeković 2017
- Zenão 2017

**Figure S2.** Data from Figure 1, colour coded by the study from which the data point was extracted.
